# Supplementary material for: Virtual Screening and Biomolecular Interactions of CviR-Based Quorum Sensing Inhibitors Against Chromobacterium violaceum
Source: PubMed Central journal article supplement (PMC6132053; doi:10.3389/fcimb.2018.00292), 2018-09-04
Supplement: Data_Sheet_1.pdf [file Data_Sheet_1.pdf]

## *Supplementary Material*

# **Virtual screening and biomolecular interactions of CviR-based quorum sensing inhibitors against *Chromobacterium violaceum***

**Vinothkannan Ravichandran, Lin Zhong, Hailong Wang, Guangle Yu, Youming Zhang \***

Shandong University–Helmholtz Institute of Biotechnology, State Key Laboratory of Microbial Technology, School of Life Science, Shandong University, Qingdao - 266237, P.R. China

**\* Correspondence:**

Corresponding Author: Youming Zhang  
[zhangyouming@sdu.edu.cn](mailto:zhangyouming@sdu.edu.cn)

**Table S1: The primers used in this study**

| <b>Gene</b>   | <b>Primers</b>          |
|---------------|-------------------------|
| cviR-5RT      | GGTATTGGGACGCCTGAACA    |
| cviR-3RT      | CTGGGAGTACTGGTTGAGCC    |
| cviI-5RT      | GAAACCGTCCTCGCATAAGG    |
| cviI-3RT      | CTGAAACTAAGCTGCGACAGTTG |
| vioB-5RT      | ATGCGAATGCTCGTAATGCG    |
| vioB-3RT      | TCCTCAACGAGCTGACCAAC    |
| vioC-5RT      | TTGCTATGCATGTAGCGGGTG   |
| vioC-3RT      | CAAGGCCTTTCCCGAGTTCAC   |
| vioD-5RT      | GGAACACCTTGGCGACGTAT    |
| vioD-3RT      | GGACACGATGAGCACCTTCA    |
| rpoD-cvir-5RT | GAATTCGGAGTCCACCGAGG    |
| rpoD-cvir-3RT | GCATCCAGGTATGCGAGGAA    |

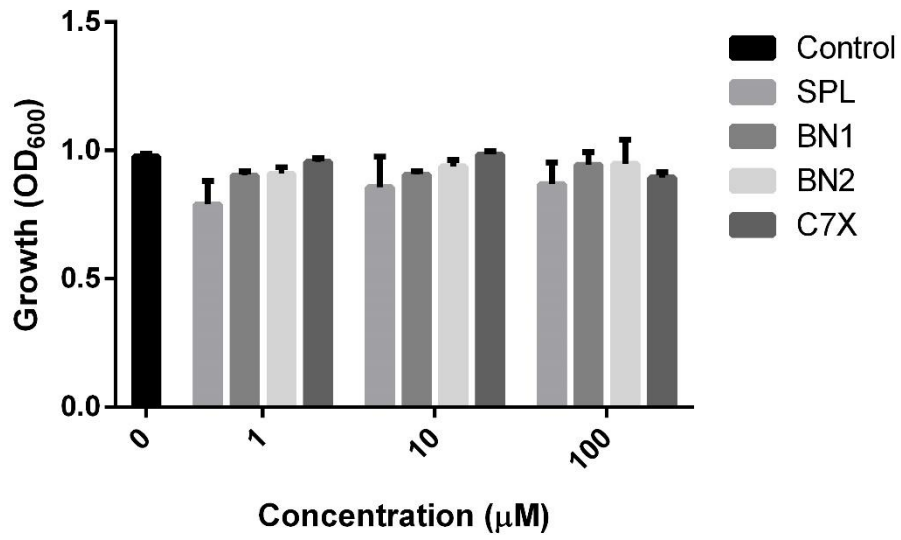

**Figure S1: The influence of QSIs on the growth of *C.violaceum*. Though there is a fluctuation, there is no significant growth inhibition was observed.**

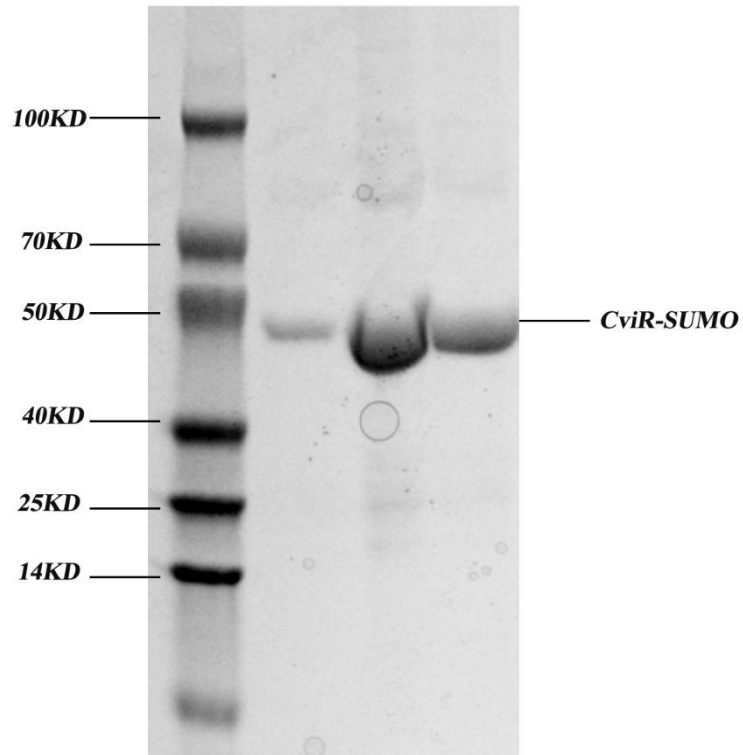

**Figure S2: The purified CviR protein with SUMO.**
